# Supplementary material for: NMUR1 in the NMU-Mediated Regulation of Bone Remodeling
Source: MDPI journal article supplement (doi:10.3390/life11101028), 2021-09-29
Supplement: s1 [file s1]

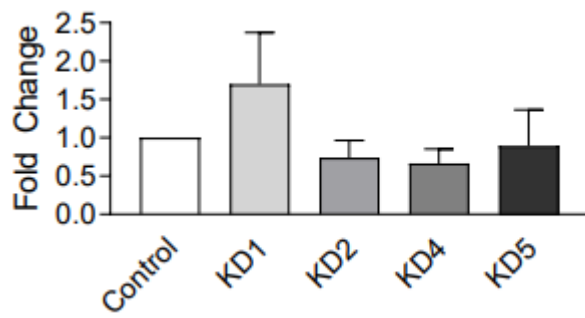

**Figure S1.** Expression of *Nmur1* in scramble control cells and putative *Nmur1* knockdown (KD) lines.

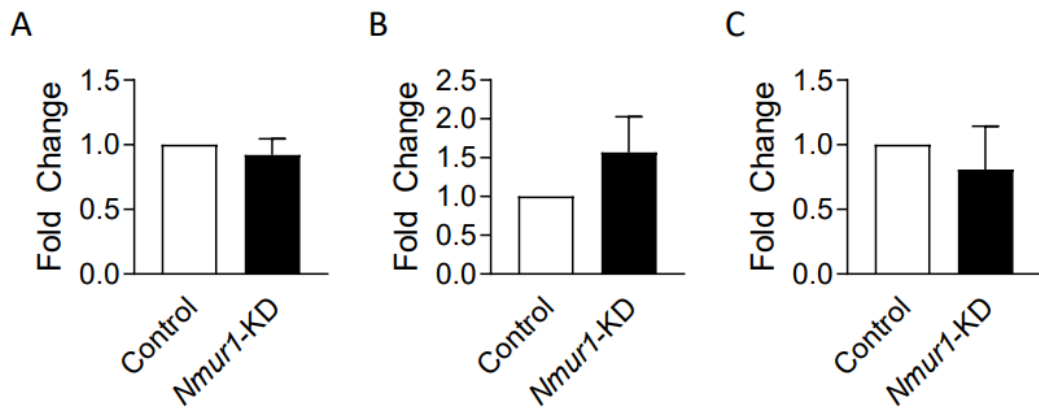

**Figure S2.** Expression of *Runx2* (A), *Sp7/Osterix* (B), and *Bglap/Osteocalcin* (C) in scramble control cells and *Nmur1* knockdown cells.

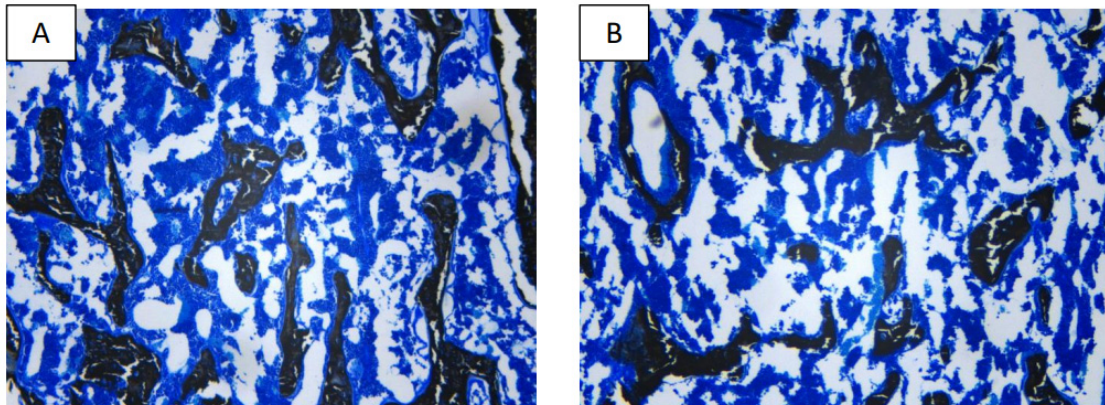

**Figure S3.** Representative images of histological specimens from wild type control or *Nmur1* knockout (A) and (B).
